# Supplementary material for: Quantifying the success of measles vaccination campaigns in the Rohingya refugee camps
Source: PubMed Central journal article supplement — Epidemics. Author manuscript; Available in PMC 2021 Jul 9. (PMC7343595; doi:10.1016/j.epidem.2020.100385), 2020-01-09
Supplement: NIHMS1578444-supplement-1.pdf [file NIHMS1578444-supplement-1.pdf]

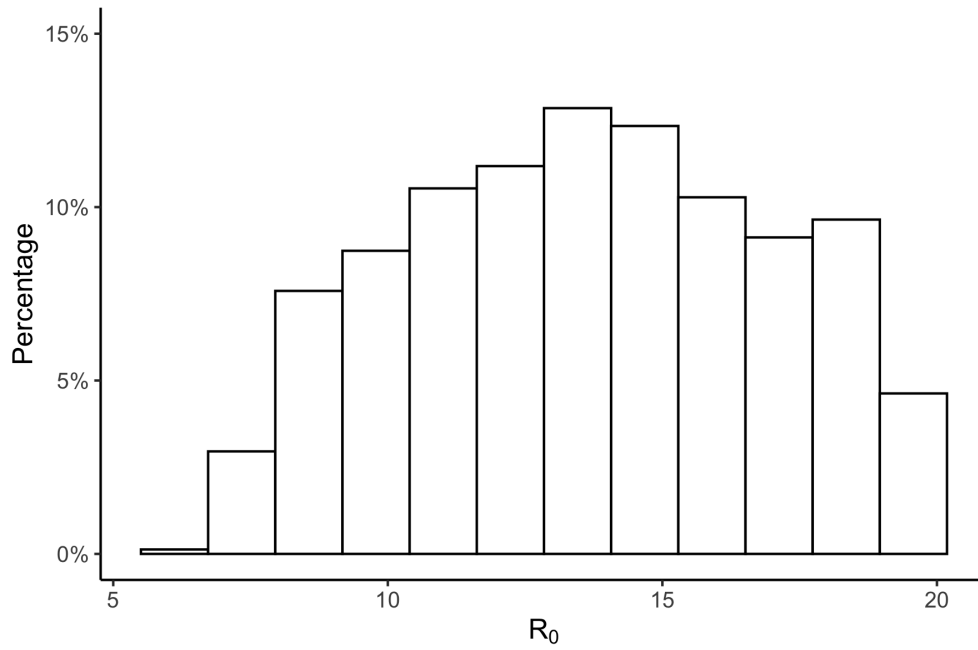

Figure 1: Histogram of estimated  $R_0$  values using LHS with 1,000 parameter combinations, where the maximum has been restricted to 20. Summary statistics: 13.67 (mean), 13.69 (median), 7.76 (2.5%) and 19.49 (97.5%)

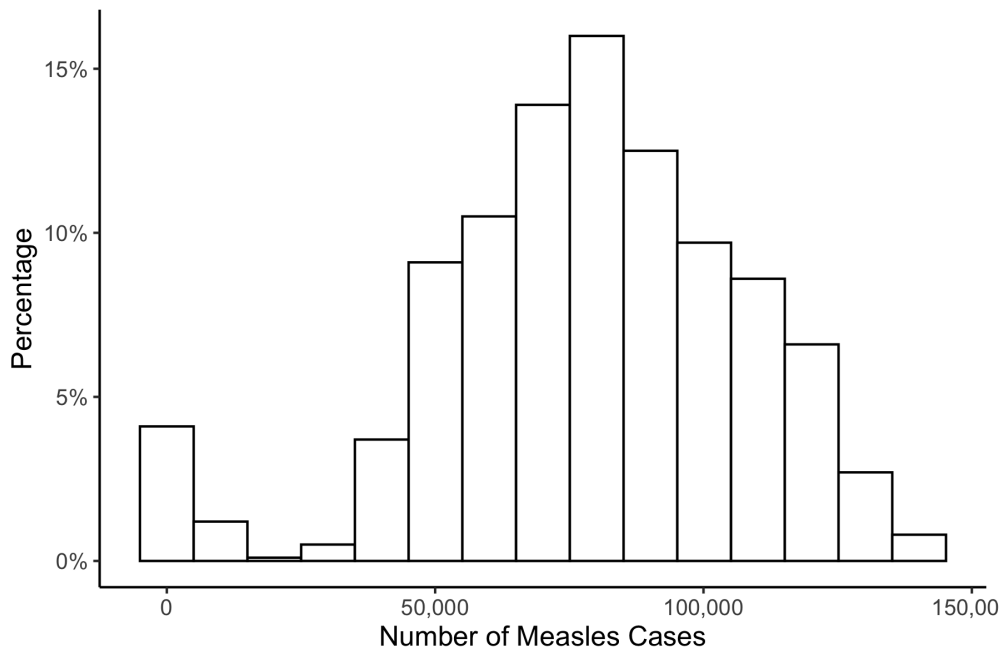

Figure 2: Histogram of estimated size of 2017 measles epidemic if vaccination had not occurred using LHS with 1,000 parameter combinations. Summary statistics: 78,151 (mean), 79,404 (median), 609 (2.5%), 127,147 (97.5%)

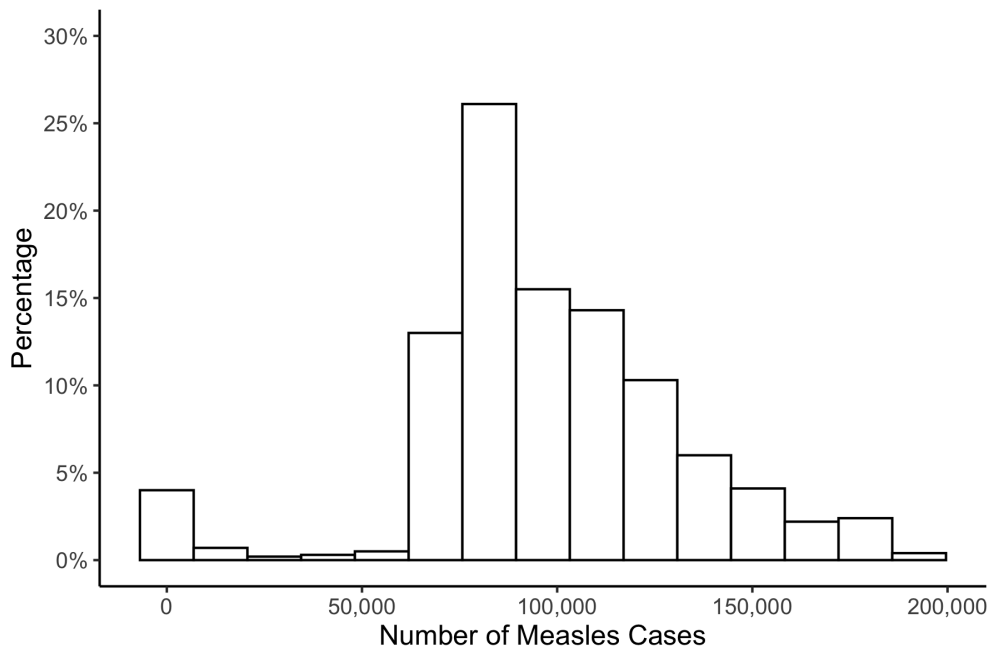

Figure 3: Histogram of estimated size of next measles epidemic if vaccination does not occur using LHS with 1,000 parameter combinations. Summary statistics: 97,637 (mean), 93,718 (median), 47 (2.5%), 173,397 (97.5%)
